# Supplementary material
Source: PubMed Central journal article supplement (PMC6050099)
Supplement: NIHMS958861-supplement-2.pdf [file NIHMS958861-supplement-2.pdf]

# Supplementary Table 1

|        |       |       |        |       |        |        |        |
|--------|-------|-------|--------|-------|--------|--------|--------|
| AKT1   | ALK   | APC   | ARAF   | AXL   | BRAF   | CD74   | CDH1   |
| CTNNB1 | DDR2  | EGFR  | ERBB2  | ERBB4 | FBXW7  | FGFR1  | FGFR2  |
| FGFR3  | FOXL2 | GNA11 | GNAQ   | GNAS  | HRAS   | IDH1   | IDH2   |
| KDR    | KIT   | KRAS  | MAP2K1 | MET   | MSH6   | NRG1   | NOTCH1 |
| NRAS   | NRG1  | NTRK1 | NTRK2  | NTRK3 | PDGFRA | PIK3CA | PTEN   |
| RAF1   | RET   | RIT1  | ROS1   | SMAD4 | SRC    | STK11  | TP53   |

Supplementary Table 1. Custom capture-based NGS panel of 48 genes
