# Supplementary material
Source: PubMed Central journal article supplement (PMC6050099)
Supplement: NIHMS958861-supplement-3.pdf [file NIHMS958861-supplement-3.pdf]

## Supplementary Table 2

|       |            |            |            |            |            |            |            |
|-------|------------|------------|------------|------------|------------|------------|------------|
| ROS1  | exon<br>36 | exon<br>37 | exon<br>38 | exon<br>39 | exon<br>40 | exon<br>41 | exon<br>42 |
| Read  | 4535       | 3491       | 3020       | 3778       | 3558       | 3552       | 3407       |
| Depth | ±10        | ±28        | ±27        | ±35        | ±25        | ±32        | ±22        |

|       |              |              |              |              |
|-------|--------------|--------------|--------------|--------------|
| ROS1  | intron<br>31 | intron<br>32 | intron<br>33 | intron<br>34 |
| Read  | 3223         | 3076         | 3118         | 2425         |
| Depth | ±172         | ±96          | ±105         | ±325         |

|       |              |            |            |            |            |            |
|-------|--------------|------------|------------|------------|------------|------------|
| ALK   | intron<br>19 | exon<br>21 | exon<br>22 | exon<br>23 | exon<br>24 | exon<br>25 |
| Read  | 2241         | 2115       | 2562       | 2752       | 2862       | 2896       |
| Depth | ±35          | ±19        | ±29        | ±28        | ±34        | ±53        |

Supplementary Table 2. Read depths for ALK and ROS1 used in NGS
