# Supplementary material
Source: PubMed Central journal article supplement (PMC6050099)
Supplement: NIHMS958861-supplement-4.pdf [file NIHMS958861-supplement-4.pdf]

ROS1 Cohort

Supplementary Table 3

| Pt ID | line of TKI therapy | Prior Chemotherapy | Days until systemic progression or intolerance | prior tx  | On- Target resistance mechanisms |          | Off- Target resistance mechanisms |                 |
|-------|---------------------|--------------------|------------------------------------------------|-----------|----------------------------------|----------|-----------------------------------|-----------------|
|       |                     |                    |                                                |           | KDM                              | ROS1 CNG | Alternate oncogenic mutation      | CNV             |
| 1     | 2                   | no                 | 51                                             | criz/cer  | neg                              | NA       | CTNNB1 S45F                       | ERBB2/SRC/NOTCH |
| 2     | 2                   | yes                | 57                                             | criz/brig | neg                              | NA       | neg                               | neg             |
| 6     | 2                   | yes                | 30                                             | criz//cer | neg                              | NA       | neg                               | neg             |
| 3     | 1                   | yes                | 156                                            | none      | neg                              | neg      | neg                               | neg             |
| 4     | 1                   | yes                | 106                                            | none      | neg                              | NA       | neg                               | NA              |
| 5     | 1                   | no                 | 450                                            | none      | neg                              | neg      | KIT D816G                         | NA              |
| 7     | 1                   | no                 | 533                                            | none      | L1951R (9%);<br>L2026M (19%)     | NA       | neg                               | neg             |
| 8     | 1                   | no                 | 187                                            | none      | neg                              | NA       | neg                               | neg             |
| 9     | 1                   | no                 | 151                                            | none      | neg                              | NA       | neg                               | KDR/PDGFRA      |
| 10    | 1                   | no                 | 264                                            | none      | neg                              | NA       | neg                               | neg             |
| 11    | 1                   | no                 | 74                                             | none      | neg                              | NA       | neg                               | neg             |
| 12    | 1                   | yes                | 1461                                           | none      | neg                              | NA       | MET A347T; GNA11 D301A            | neg             |

ALK Crizotinib Cohort

| Pt ID | line of TKI therapy | Prior Chemotherapy | Days until systemic progression or intolerance | prior target tx | On- Target resistance mechanisms |          | Off- Target resistance mechanisms |                                                                |
|-------|---------------------|--------------------|------------------------------------------------|-----------------|----------------------------------|----------|-----------------------------------|----------------------------------------------------------------|
|       |                     |                    |                                                |                 | KDM                              | ALK CNG  | Alternate oncogenic mutation      | CNV                                                            |
| 4*    | 1                   | yes                | 126                                            | none            | L1196M                           | neg      | neg                               | NA                                                             |
| 5*    | 1                   | yes                | 793                                            | none            | L1196M                           | neg      | neg                               | NA                                                             |
| 6*    | 1                   | yes                | 394                                            | none            | G1269A                           | neg      | neg                               | NA                                                             |
| 7*    | 1                   | yes                | 197                                            | none            | G1269A                           | positive | neg                               | neg                                                            |
| 9*    | 1                   | yes                | 168                                            | none            | neg                              | neg      | EGFR L858R                        | NA                                                             |
| 10*   | 1                   | yes                | 28                                             | none            | neg                              | neg      | KRAS G12C                         | DDR2/KRAS                                                      |
| 11*   | 1                   | yes                | 215                                            | none            | neg                              | neg      | KRAS G12V                         | NA                                                             |
| 12*   | 3                   | yes                | 42                                             | criz/cer        | neg                              | neg      | lost ALK                          | neg                                                            |
| 13*   | 1                   | yes                | 32                                             | none            | neg                              | neg      | NA                                | NA                                                             |
| 14*   | 1                   | yes                | 273                                            | none            | neg                              | neg      | neg                               | NA                                                             |
| 16*   | 1                   | yes                | 852                                            | none            | neg                              | neg      | neg                               | neg                                                            |
| 17_1* | 1                   | yes                | 396                                            | none            | F1174C                           | neg      | neg                               | NA                                                             |
| 17_3  | 3                   | yes                | 121                                            | criz/cer        | F1174C                           | neg      | neg                               | ARAF                                                           |
| 18*   | 1                   | yes                | 218                                            | none            | neg                              | neg      | KRAS G13D                         | NA                                                             |
| 19    | 1                   | no                 | 277                                            | none            | neg                              | NA       | neg                               | NA                                                             |
| 20    | 1                   | yes                | 886                                            | none            | neg                              | positive | NA                                | NA                                                             |
| 21    | 1                   | yes                | 153                                            | none            | neg                              | NA       | neg                               | EGFR                                                           |
| 23    | 1                   | yes                | 394                                            | none            | Test fail                        | NA       | neg                               | NA                                                             |
| 24_1  | 1                   | yes                | 182                                            | none            | neg                              | neg      | neg                               | neg                                                            |
| 26    | 1                   | yes                | 94                                             | none            | neg                              | neg      | neg                               | MAP2K1/ARAF                                                    |
| 27    | 1                   | no                 | 76                                             | none            | neg                              | neg      | IDH1                              | EGFR/CDH1/<br>AXL/ARAF                                         |
| 28    | 1                   | no                 | 139                                            | none            | neg                              | NA       | NF1                               | neg                                                            |
| 29_1  | 1                   | yes                | 629                                            | none            | E12010K                          | neg      | neg                               | neg                                                            |
| 31    | 1                   | yes                | 636                                            | none            | neg                              | positive | EGFR e19d                         | NA                                                             |
| 32    | 1                   | yes                | 73                                             | none            | neg                              | neg      | neg                               | neg                                                            |
| 37    | 1                   | yes                | 455                                            | none            | neg                              | neg      | neg                               | FOXL2/HRAS/<br>AKT1/TP53/<br>ERBB2/STK11/<br>GNA11/AXL/<br>SRC |
| 39    | 1                   | yes                | 133                                            | none            | L1196M                           | NA       | neg                               | neg                                                            |
| 40    | 1                   | no                 | 83                                             | none            | neg                              | NA       | neg                               | GNAS                                                           |
| 41    | 1                   | yes                | 1035                                           | none            | neg                              | NA       | Neg                               | DDR2                                                           |
| 46    | 1                   | no                 | 191                                            | none            | neg                              | NA       | RIT1 K139                         | neg                                                            |

## Ceritinib Cohort

## Supplementary Table 3 cont.

| Pt ID | Line of Therapy | Prior Chemotherapy | Days until Systemic Progression or Intolerance | prior target tx | On- Target resistance mechanisms |          | Off- Target resistance mechanisms |                                        |
|-------|-----------------|--------------------|------------------------------------------------|-----------------|----------------------------------|----------|-----------------------------------|----------------------------------------|
|       |                 |                    |                                                |                 | KDM                              | ALK CNG  | Alternate oncogenic mutation      | CNV                                    |
| 8*    | 2               | yes                | 213                                            | criz            | neg                              | positive | <i>NOTCH1</i> D1533A              | neg                                    |
| 15*   | 2               | yes                | 76                                             | criz            | D1203N                           | neg      | neg                               | NA                                     |
| 17_2  | 2               | yes                | 326                                            | criz            | F1174C                           | neg      | neg                               | neg                                    |
| 24_2  | 2               | yes                | 166                                            | criz            | neg                              | positive | neg                               | NA                                     |
| 25    | 2               | yes                | 110                                            | criz            | G1202R (25%); G1202X (19%)       | NA       | neg                               | <i>RIT1/NTRK1/H</i><br><i>RAS/AKT1</i> |
| 38    | 3               | no                 | 672                                            | criz/brig       | F1174L                           | NA       | neg                               | NA                                     |

## Alectinib Cohort

| Pt ID | Line of Therapy | Prior Chemotherapy | Days until Systemic Progression or Intolerance | prior target tx               | On- Target resistance mechanisms |         | Off- Target resistance mechanisms |                                 |
|-------|-----------------|--------------------|------------------------------------------------|-------------------------------|----------------------------------|---------|-----------------------------------|---------------------------------|
|       |                 |                    |                                                |                               | KDM                              | ALK CNG | Alternate oncogenic mutation      | CNV                             |
| 22_2  | 6               | yes                | 41                                             | criz/alec/<br>criz/lor/ criz/ | neg                              | NA      | <i>RALGAPA1-<br/>NRG1</i>         | neg                             |
| 33    | 2               | no                 | 401                                            | criz                          | G1202S                           | NA      | neg                               | <i>CTNNB1/KIT/<br/>KDR/ARAF</i> |
| 43    | 2               | yes                | 226                                            | criz                          | G1202R                           | NA      | neg                               | <i>CDH1</i>                     |
| 44_1  | 2               | no                 | 466                                            | criz                          | neg                              | NA      | neg                               | neg                             |

## Brigatinib Cohort

| Pt ID | Line of Therapy | Prior Chemotherapy | Days until Systemic Progression or Intolerance | prior target tx | On- Target resistance mechanisms |           | Off- Target resistance mechanisms |                                                                         |
|-------|-----------------|--------------------|------------------------------------------------|-----------------|----------------------------------|-----------|-----------------------------------|-------------------------------------------------------------------------|
|       |                 |                    |                                                |                 | KDM                              | ALK CNG   | Alternate oncogenic mutation      | CNV                                                                     |
| 29_2  | 2               | yes                | 329                                            | criz            | S1206C (24%);<br>E1210K (26%)    | neg       | neg                               | NA                                                                      |
| 30    | 2               | yes                | 128                                            | criz            | F1174L                           | neg       | neg                               | neg                                                                     |
| 35    | 2               | no                 | 612                                            | criz            | neg                              | test fail | neg                               | <i>APC/FGFR1/<br/>AXL</i>                                               |
| 36    | 2               | no                 | 350                                            | criz            | neg                              | NA        | neg                               | <i>ARAF</i>                                                             |
| 42    | 2               | yes                | 539                                            | criz            | neg                              | NA        | <i>NOTCH1</i> D1538A              | neg                                                                     |
| 44_2  | 3               | no                 | 390                                            | criz/alec       | NA                               | NA        | <i>CCDC6-RET</i>                  | NA                                                                      |
| 47    | 2               | yes                | 1546                                           | criz            | F1174L (20%);<br>L1198V (10%)    | NA        | neg                               | <i>NTRK1/<br/>MSH6/APC/<br/>FGFR1/<br/>NOTCH1/<br/>PTEN/<br/>MAP2K1</i> |

## Lorlatinib Cohort

| Pt ID | Line of Therapy | Prior Chemotherapy | Days until Systemic Progression or Intolerance | prior target tx | On- Target resistance mechanisms |          | Off- Target resistance mechanisms |     |
|-------|-----------------|--------------------|------------------------------------------------|-----------------|----------------------------------|----------|-----------------------------------|-----|
|       |                 |                    |                                                |                 | KDM                              | ALK CNG  | Alternate oncogenic mutation      | CNV |
| 22_1  | 4               | no                 | 22                                             | criz/alec/criz  | neg                              | positive | neg                               | NA  |
| 45    | 4               | no                 | 146                                            | criz/brig/alec  | D1203A                           | NA       | neg                               | neg |

Abbreviations: Pt – patient; criz- crizotinib, cer – ceritinib, brig – brigatininb, alec – alectinib, neg – not found, KDM – kinase domain mutation, AM – alternative mutation, CNG – copy number gain  
Key: direct sequencing- green, NGS – blue, SNaPshot-yellow, Direct sequencing and NGS-purple, NGS and snapshot –orange. \* Indicates patients whose data has been presented previously.
